# Supplementary material
Source: publisher figshare collection journal article supplement (https://tandf.figshare.com/ndownloader/files/14368652)
Supplement: Supplementary file 1 [file 14368652]

xread
343 46
Erythrosuchus_africanus	00010001200002001000000000000000000010000000000000001010000000001000000000000000000000001000000000000100000000000110000000?00000000010?000000000000000??1000?001?000101?000?00??01??0???000?0000001000000000000??000000000010001000000000001??00000000000000000000010000010000000?00?00?0000000000?000000000001000?0???????000010110101001000001000?0-0
Euparkeria_capensis	000100000000?000010000000100000000000000000100000000[0 1]0002000000010100000000000001000000000000000000011000000000001000000000000000010000010000000000000001000?00000010000000000??010?000?00000000000000000000000??0000000000100010001000000000000000000000000000000000?00000000000?00?0000000000010?0000000000000000101000001002100000110??000001000?0-0
Revueltosaurus_callenderi	000000002000030101101001020101000000000010010100011012002000000011211000000?20????0?001?001?00000000110000110000?1110000000001000020100011000000000000?01001010000000110110?0???000?0?0?????0000000000000000000??000000000000011000100000000000000000000010000001000010000?000100?00?0001101101021010?0000?000000??10012112?2022001??01???00000100??0-0
Aetosaurus_ferratus	10100000111000011010011002010?00?10000000011010?011012002011000??12?1?00000?????1???001000110??21??1??0001000010?111??????????????????????0?000000???0001?01010000000110110?00??00000???00000?[0 1]000?00000000000???00?0000000?0011000100000000000000?00000?10?000010??0????0??????????????????1?1?21?????????0??0???210012112210221??0110???00000100000-0
Arizonasaurus_babbitti	??????1????00?00??00011000000100???????000?100000000?000200000001001100000000011?010001?001?000001101100000000000111000010?0000000010?0000?11000100???0010?1010?????????????????????????????00100010020000?001110021111100011?10000100000001001000100?0????????????????????????????????????????????????????????????0???????200?20??00?10110?????????0??
Effigia_okeeffeae	011000104??0?20???01?111000000000000000011?000120010???000?1000001211010?????111?0?0001?001000?01001000102????????11???000?01?0?1101??000111111011?0110?00?1001??0?10?1?000100??00?000??????10110000021010?00111102122100001??30100??0000011??101110000001?0100010010100010000100?0??00011011?1?11?10000001010100?10??????00102200??10000?00000100000-0
Batrachotomus_kuperferzellensis	2?0?000?10010100101001100000111101001001100110011000?00020000001112110011000?01111110011101?00000110110000000000011100000000000000211000100010001001000010?101000000011110??????????????????001000100000001001100010010100011010000100000001001010000000010000001010010000??????0??1????110?101021?100000??000?10?2111?10?012021001000101100000100??0-0
Postosuchus_kirkpatricki	0001000010000101010000020101111101001001101110011100111031000001112110?110012011??1?00111111000201101100000000000111??00???????000?1?00000000000000??0??1011011001000111?00100??00???0??0000001?0010000000????????1??1110001?010000100000000001010?00000010000001011011000?????00?01?0001102101111?10000001010110?0111?100?120031010110011000001000?0-0
Dromicosuchus_grallator	2000000?200011111100000001001?1000010001111110?1?10011102110????????????100?????????001?011?000?021011000000000001?1????????0??0000?1???000?0000000?00201011111001110011?00100?10???????????00110010000100?00????01??????????010000100000100001010?00000010000001001011000?????00??1????11021011?1?11?00???????????11101000120220??01?1?210?????????0-0
Eudimorphodon_ranzii	1110???010100?0?0200011000000??0??0?000???0?????0?00000?0??1????????????????????????10??0?100?000000?00?001?0000?101????1???0000000?1?0?0?00?????0?01000????110000110?0?001??????00000110?110?0100???0?00?00000??00??0?0000001????????0?00??2??????0?0??????0?????????????1?0???0?1??1????1?01?????11?001?1??0110000??????1200031?211000210000???0?0???
Dimorphodon_macronyx	2100??1?2010000?11?0011000000?????00000???010?0?00000??00??0????????????????????????101?20?00??00??0?00??01?0000?1?1????1?1??????00?1??000?????????010??????110000110?????1?0???00000?110?1?000100?000100?00000??00????0000?0110000?00000000??001020000000?00?000?0??1?00?11000?0?1??101??1??1?????110001?001??1?000???????2000?0?21???01100001100000??
Lagerpeton_chanarensis	???????????????????????????????????????????????????????????????????????????????????????????????????????????????????????????????????????0??000000000?????????????????????????????????????????0000000000000000000??0000000000001111001100010?0100010?0010100?0000000010100011100111?1001011?1?01???2011100000000001200????????????????????210?0000001?0-0
Dromomeron_romeri	?????????????????????????????????????????????????????????????????????????????????????????????????????????????????????????????????????????????????????????????????????????????????????????????????????????????????????????????1111001100010102?001110111100000000000101?00??????11?1001011?1?01???2?1???????????????0???????????????????????0000010???-0
Dromomeron_gregorii	?????????????????????????????????????????????????????????????????????????????????????????????????????????????????????????????????????????????????????????????????????????????????????????????????????????????????????????????1111001?01010100000111011110000000000?????00??????1????????1??????????????????????????????????????????????????000???????-0
Marasuchus_lilloensis	????????????????????????????????????????????????????????????????01210000?001100????0???????????????????????????????101000?0000000000?00000000000000000??1?????1000?101???0??????????????????0000000000100000010??1100000001011100001001001100000?0?00001000000000101010000110010101001001?010000100111000000000012?0???????00??????????010000011000?0-0
Eucoelophysis_baldwini	?????????????????????????????????????????????????????????????????????????????????????????????????????????????????????????????????????????????????????????????????????????????????????????????????????10????????????????????0??12001??1110001???0??1100010?100??????????????????????????????????????????????0???????????????????????????????????????????
Sacisaurus_agudoensis	??????????????01?000000000000?????????????????????????????????????????????????????????1?????0?101????????101001110?1????????????????????????????????????1?????1?????????????????????????????002???010?0000100?0??1????????????100111011100010000???100010010120001?????????????????????????????????????????????????????????200??????????010000??????000
Silesaurus_opolensis	0?0?000?20?0000100000000000001?000?0???00?0100100000?10020001??00021010000011001?001001?00100112100101000100001010111100100000000001000000000000110000??110101100001010?000?00??0???????????0020000101000010010??110110000111012011101110[0 1]01000010110001001012000101110001?1???0101001010?0?01???2011110?00010101210????????00?20????0001100001110??000
Eocursor_parvus	???????????????????????????????????????????????0????????????????01210100??????????????????1??100?001??10?0?1011?11?1????????0?0001?0??00?10?001?1?0?????11????11?0?101??????????????????????00210001020000?11????01??10?0021?110002101200011110010?000020000?3010101?10??1??????1???????????????????11???000???????0?????????????????1????0100???0??000
Pisanosaurus_mertii	???????????????1?1?01??0????????????????????????????????????????????????????????????0?????????000001?01200?1111111?1?????0?0???0000???00??????????????????????????????????????????????????????????0?????????0?????????????2???????????????????001??0000?0000020001011100?1?????01010?111??0?01???21111???0?01??????0????????0??????????12??0000010???00
Heterodontosaurus_tucki	000100000011101100001000000001000000000011010002000003001000101?0121?110000111???0??001101111?0[0 2]000100120[0 2]11100111111000000001000000?000211?0011100001?111?0?1110011010001011000100001120000?021000002100011110??01??100002011?0??????20?010110010?0000200001201??0110???111000?1?10?1?1??1?01?????111100?00101?1200??????20001100101000100?00???0000??
Lesothosaurus_dianosticus	00010?0?3000001101001000000001000000000011010000000003000010101001210100000??1??10??00110111110000010112000101101111????000001000000??0001??0?111?0??1??110???1100?1000?01010???000?00??000000210?0102100011110??01??1000021111000210120001011?0100000020000030101?111?00?????001?100111??0?01???21111100000101???00???????0001010000000??010????000000
Scutellosaurus_lawleri	??0??0?????????10??01??000?????????????00??10??2???????00??????0???????0?????1??????0?1?????110[0 2]0????1????01011011?10???00?00??0?000??00?00??0???00?00?11??0?000001101000???????0???????????0?21000102?100111?????1??0?????1111000?1?12000?0110010000002000003010?01?10001?????010100111????01???21110?????0??????01???000?????10??????01?0?000100?0000
Saturnalia_tupiniquim	???????????????[0 1]???0????0?????????11??????????1??????????????????1????????0??????????1?????????0?????????[0 1]01001001?1???0???0??100001??0000000000001001??1000?111000111??010?????????????????002000021110001001100110012100211010002102100111110011?0000200001111010111001111110010101111??0?01???2011110000011101?00???????????????????020000001000?000
Plateosaurus_engelhardti	01001010200101010200001001000100111100000101001000000301000010100121010000001101?20?0111?1100101000110001101011001111100001001100001001000000001001000011000?111001111000101010101111112000000200000021000100110011001210021101000210210001111001100000200000111010111000111110010101111??0?01???2011010000011101100???????2001010?000001000000[0 1]0001000
Efraasia_minor	0?001?1010010101?20000?000000100??11000001?1001????00??1?000????01210100000011??1???011?01??000000?1?000?101001001?11??010?001100?01000000000000001001?110?0?1110011110001010?01011?111?000?0020000002100010010??1100121002110100021021000111100110000020000011101011100011111001010?111??0?01???2011010000011101100??????120010?0?00000000000???001000
Herrerasaurus_ischigualastensis	20010?00100101000100000000000?0000100000?10100000000030010001?1?012111000000?1??1???001101100??00000?100?000000001111000?01001100101??0020000000001011?11?????111011010000011201100110130101002000000210001001110110112000201010102102100110110011?0000200100101010111001111110010101111??0?01???2011110000011101100???????0001301?0101001000001[0 1]000000
Staurikosaurus_pricei	????????????????????????????????????????????????????????????????????????????????????????????00000?00??00?000000001?1???0????01?00?????000000000?00101???????????????????????????????????????002000000210001001110110111?00?011?000210110011111001??00002001001000101110001?????????????????????????????????????????0????????????????0??0010000???0??000
Chindesaurus_bryansmalli	???????????????????????????????????????????????????????????????????????????????????????????????????????????????????1?????0?????200?1??00??00?0????100????????????????????????????????????????0???0???2?0??100??????1??????????10002102100110110000?0000200110[2 3]0001?????????????0101?11?1???????????????????????????????????????????????00?000000?0??000
Eoraptor_lunensis	00010?00100112000100000100000?0011111000?1010010000013001000101?012?1?0?00??????????001?011000?00001?????101?0[0 1]?0101???00??001?0??0?0000200000?000?0?1?110?0?11110110100010101??0001110??1010020000212?00110011???10011100??11??0??1?110?0???100????00020000?1000101?10??11111??10?0??1???0?0????2?11110000?1?1?1?00??????10102010??00?0110000000001000
Tawa_hallae	1110000000111?0001000?0000000100??110000010100000001?30000?01?1001211?000000?11?1001001?011000000000??00?000000001?111?011111111010100??000000?000?011?111????11101101000001120010011012010101200001120001100?110?101?1???2??12000220110001210001110000200110200010111000111110010101111??0?01???2111110000010101200??????1000?3011?0010110000001000000
Coelophysis_bauri	1110111110111?0002000101100001?010111000010100100001130010?0101001211110000111???00?0011011000?00000?100?0000000011111001111111110010000001000111010111111?0?111101101000101121110011113010111211102121111100111011?11111021?12000210220011210011110000210111211010111011111010010100111??1?01???21111110100101012?0????0??1212210210001201010000110111
Syntarsus_kayentakatae	1110111110111?000200010110100?00??1110?0010100100000130020?0???????0???0000111??1???001101100??00????1001000000001?1?10011111111100?0?00??1??01111???11111?10111101?01??0?01????1?????12010?1?2?1102121??1100111011?1?111?21?020002?0220011210011110000210111311010110?111?101001010?111??1??1????1111110?00101???0???????1120320100011?????0000011?1??
Liliensternus_liliensterni	??????????????000?000??1100?0???????????????0?????01?3?020??1110??????????????????????1?????000?0?????00100000000111???011??11010001??000?0?00??10???1??1??101111011010001011???1???????????11211[0 1]0212001110011101101111??21?020002101200012100011?00002101112110101110001?????010100111??1??1???21111???000101???0?????????2??201????101?0000000??0012
Zupaysaurus_rougieri	??????????????0012000?0110100????11110100100?000000113010000????0?211?00000???????????11011?0??000?0?10??000?00?01??????1????????????????????????????????????????????????????????????????????????????????????????????????????????????????????????????????????21101????0??1?????010100111??1??????2?????????????????????????020320111110????000000????12
Dilophosaurus_wetherelli	11101?11100?1?001100??00101001?0??11110??101000??00113000000????012111000101110??2??001111?00000001001?010000000011110000111111200010?0100000011101??1?111?1011110010100010112??10011112010111211002121011100?110?1011111121?0200021?120001210001110?002101113110101110?1111010010100111??0?01???2111111000010101200??????102033112?0110110000001?10001
Cryolophosaurus_ellioti	???????????????01?00???1???0??0??11111101100??000000?3000?001?10?1?????00101????0??????1111??????010?10????0??0?01?1??????????12?001000100?????1???0?????????????0???1????????????????????????????02?21?11??0????1???111??????2000210?200112100011?0?00??????2??0????????1?????01?10?1????1??1???211??????????????????????1???330??0?0100?0?0??0????001
Ceratosaurus_nasicornis	2000101100010000010001000000010011111110010100120000130000?01?10012111000001111010??001111100??00000?10010000000011010010111111200010101011??01111?110?10111011??????10???011???10???1??010?01211?0212??111000???110??111?21?020002100200010100111?00002100013110?01100100?????02110?111??1???????1110110100101????????????02132011000100?01000001??001
Piatnitzkysaurus_floresi	??????????????00?1000?00001001?????????00???????????????????????01211100?11111???2?1??1??1????????????????00000001?1?011?01111120001??11001?0011111??1??1??1011110010100????????????????????0?211002021111?00?1101??1111?121?02000220020001?100011?00002101113110100110101?10100?1???????????????2??1??????1????????????????10?????????001000000?0??000
Allosaurus_fragilis	210010112001011011?00010021001011111111001010000000013000000111001211100011111??02??001111100000001001001000000001111011101011120001011100000011111111110101011110110100010112111101111?1??101211002021011100110111021111121?02000220020001010001110000210111311010111010111010021100111??0?01???2111011000110101200??????10203301100010010100000000000
Velociraptor_mongoliensis	01001011100100101110000010100100111111100101001000000310000011100121?1001111111?????0011011000000000?100100000000111??11???????????10?01?01001111110?11101?1111100110100000012111000111?1??101211002021011110111011?20010020102010220?200010100011100002101?13110?01?0010?11???02110?111??1?01????111011000010101200??????10103110100?00??00000000000??
Camposaurus_arizonensis	?????????????????????????????????????????????????????????????????????????????????????????????????????????????????????????????????????????????????????????????????????????????????????????????????????????????????????????????????????????????????????????????21101???????1?????01010?111??1?01???211???????????????????????????????????????1111111?????
Coelophysis_rhodesiensis	1110111111111000020001111000010010111000010100100001?3001000111?012111100001111?1???0011011000020000??00000000000111110?1?1111111?010000001100111010111111010111101101000101121110011113010211211102121111100111010011111121012000210220011210011110000210111311010111011111010010100111??1?01???2111111010010101200???????111201021?001201011001110101
Eodromaeus_murphi	????110?10?10?00[0 1]?00000101100????0??????????????????1??01?0?????01211100???0?1??????001?????0??00?????0??000000001011?001?10?111000???00000000100??001??101??1111011?100?101120010001[0 1]?3010000?00002021??010011101??0??1??2?11??00210[1 2]1001??100011?011020010111101011101?0?????010?0111???0??1???2??1?10?0?00??????0?????012[1 2]??21???0??[0 1]1000001??0?0000
Lepidus_praecisio_holotype	?????????????????????????????????????????????????????????????????????????????????????????????????????????????????????????????????????????????????????????????????????????????????????????????????????????????????????????????????????????????????????????????21101???????0?????0101??1?1??1?01???211???????????????????????????????????????010010????11
Nhandumirim_waldsangae	??????????????????????????????????????????????????????????????????????????????????????????????????????????????????????????????????????????0?000??01?0???????????????????????????????????????0?200002021??1???????????????????11000210110001111001110000??????1010101110001??????1???????????????????11??????1?1???0?????????????????????1?0010???0??011
;
ccode	+ 16 29 66 127 173 183 212 218 230 235 247 252 253 272 342 *;
proc /;
;
